# Supplementary material for: Omicron Waves in Argentina: Dynamics of SARS-CoV-2 Lineages BA.1, BA.2 and the Emerging BA.2.12.1 and BA.4/BA.5
Source: MDPI journal article supplement (doi:10.3390/v15020312), 2023-01-22
Supplement: s1 [file s1]

Table S1. Frequency of SARS-CoV-2 variants in Argentina.

| EW <sup>1</sup> | Alpha    |                    |     | Gamma    |                    |     | Lambda   |                    |      | Delta    |                    |       | Omicron BA.1 |                    |       | Omicron BA.2 |                    |      | Omicron BA.2.12.1 |                    |      | Omicron BA.4/BA.5 |                    |       | Others   |                    |     | Total |
|-----------------|----------|--------------------|-----|----------|--------------------|-----|----------|--------------------|------|----------|--------------------|-------|--------------|--------------------|-------|--------------|--------------------|------|-------------------|--------------------|------|-------------------|--------------------|-------|----------|--------------------|-----|-------|
|                 | Freq (%) | CI95% <sup>2</sup> |     | Freq (%) | CI95% <sup>2</sup> |     | Freq (%) | CI95% <sup>2</sup> |      | Freq (%) | CI95% <sup>2</sup> |       | Freq (%)     | CI95% <sup>2</sup> |       | Freq (%)     | CI95% <sup>2</sup> |      | Freq (%)          | CI95% <sup>2</sup> |      | Freq (%)          | CI95% <sup>2</sup> |       | Freq (%) | CI95% <sup>2</sup> |     |       |
| 44/2021         | 3.0      | 0.8                | 8.5 | 4.0      | 1.6                | 9.9 | 10.1     | 5.6                | 17.6 | 82.8     | 74.2               | 89.0  |              |                    |       |              |                    |      |                   |                    |      |                   |                    |       |          |                    | 99  |       |
| 45/2021         | 0.8      | 0.0                | 4.5 | 1.7      | 0.3                | 5.8 | 10.7     | 6.4                | 17.5 | 86.0     | 78.6               | 91.0  |              |                    |       |              |                    |      |                   |                    |      |                   |                    |       | 0.8      | 0.0                | 4.5 | 121   |
| 46/2021         |          |                    |     | 3.1      | 0.8                | 8.6 | 4.1      | 1.6                | 10.0 | 91.8     | 84.7               | 95.8  |              |                    |       |              |                    |      |                   |                    |      |                   |                    |       | 1.0      | 0.0                | 5.6 | 98    |
| 47/2021         |          |                    |     |          |                    |     | 4.4      | 1.7                | 10.9 | 95.6     | 89.1               | 98.3  |              |                    |       |              |                    |      |                   |                    |      |                   |                    |       |          |                    |     | 90    |
| 48/2021         |          |                    |     |          |                    |     |          |                    |      | 100.0    | 96.7               | 100.  |              |                    |       |              |                    |      |                   |                    |      |                   |                    |       |          |                    |     | 114   |
| 49/2021         |          |                    |     |          |                    |     |          |                    |      | 100.0    | 97.1               | 100.  |              |                    |       |              |                    |      |                   |                    |      |                   |                    |       |          |                    |     | 129   |
| 50/2021         |          |                    |     |          |                    |     |          |                    |      | 90.8     | 84.9               | 94.5  | 8.5          | 4.9                | 14.3  |              |                    |      |                   |                    |      |                   |                    |       | 0.7      | 0.0                | 3.9 | 141   |
| 51/2021         |          |                    |     |          |                    |     |          |                    |      | 59.9     | 53.0               | 66.4  | 40.1         | 33.6               | 47.0  |              |                    |      |                   |                    |      |                   |                    |       |          |                    |     | 202   |
| 52/2021         |          |                    |     |          |                    |     |          |                    |      | 21.4     | 16.4               | 27.4  | 78.6         | 72.6               | 83.6  |              |                    |      |                   |                    |      |                   |                    |       |          |                    |     | 215   |
| 01/2022         |          |                    |     |          |                    |     |          |                    |      | 9.6      | 6.5                | 14.0  | 90.4         | 86.0               | 93.5  |              |                    |      |                   |                    |      |                   |                    |       |          |                    |     | 240   |
| 02/2022         |          |                    |     |          |                    |     |          |                    |      | 3.0      | 1.4                | 6.3   | 97.0         | 93.7               | 98.6  |              |                    |      |                   |                    |      |                   |                    |       |          |                    |     | 203   |
| 03/2022         |          |                    |     |          |                    |     |          |                    |      | 1.7      | 0.7                | 4.3   | 97.4         | 94.5               | 98.8  | 0.9          | 0.2                | 3.1  |                   |                    |      |                   |                    |       |          |                    |     | 232   |
| 04/2022         |          |                    |     |          |                    |     |          |                    |      |          |                    |       | 100.0        | 98.2               | 100.0 |              |                    |      |                   |                    |      |                   |                    |       |          |                    |     | 211   |
| 05/2022         |          |                    |     |          |                    |     |          |                    |      | 100.0    | 97.1               | 100.0 |              |                    |       |              |                    |      |                   |                    |      |                   |                    |       |          |                    |     | 129   |
| 06/2022         |          |                    |     |          |                    |     |          |                    |      | 100.0    | 96.1               | 100.0 |              |                    |       |              |                    |      |                   |                    |      |                   |                    |       |          |                    |     | 95    |
| 07/2022         |          |                    |     |          |                    |     |          |                    |      | 99.0     | 94.8               | 100.0 |              |                    |       | 1.0          | 0.0                | 5.2  |                   |                    |      |                   |                    |       |          |                    |     | 105   |
| 08/2022         |          |                    |     |          |                    |     |          |                    |      | 96.7     | 88.8               | 99.4  |              |                    |       | 3.3          | 0.6                | 11.2 |                   |                    |      |                   |                    |       |          |                    |     | 61    |
| 09/2022         |          |                    |     |          |                    |     |          |                    |      | 91.8     | 80.8               | 96.8  |              |                    |       | 8.2          | 3.2                | 19.2 |                   |                    |      |                   |                    |       |          |                    |     | 49    |
| 10/2022         |          |                    |     |          |                    |     |          |                    |      | 100.0    | 91.4               | 100.0 |              |                    |       |              |                    |      |                   |                    |      |                   |                    |       |          |                    |     | 41    |
| 11/2022         |          |                    |     |          |                    |     |          |                    |      | 77.8     | 63.7               | 87.5  |              |                    |       | 22.2         | 12.5               | 36.3 |                   |                    |      |                   |                    |       |          |                    |     | 45    |
| 12/2022         |          |                    |     |          |                    |     |          |                    |      | 80.6     | 63.7               | 90.8  |              |                    |       | 19.4         | 9.2                | 36.3 |                   |                    |      |                   |                    |       |          |                    |     | 31    |
| 13/2022         |          |                    |     |          |                    |     |          |                    |      | 56.3     | 39.3               | 71.8  |              |                    |       | 43.8         | 28.2               | 60.7 |                   |                    |      |                   |                    |       |          |                    |     | 32    |
| 14/2022         |          |                    |     |          |                    |     |          |                    |      | 53.3     | 36.1               | 69.8  |              |                    |       | 46.7         | 30.2               | 63.9 |                   |                    |      |                   |                    |       |          |                    |     | 30    |
| 15/2022         |          |                    |     |          |                    |     | 3.6      | 0.2                | 17.7 | 32.1     | 17.9               | 50.7  |              |                    |       | 60.7         | 42.4               | 76.4 | 3.6               | 0.2                | 17.7 |                   |                    |       |          |                    |     | 28    |
| 16/2022         |          |                    |     |          |                    |     |          |                    |      | 16.7     | 5.8                | 39.2  |              |                    |       | 77.8         | 54.8               | 91.0 |                   |                    |      | 5.6               | 0.3                | 25.8  |          |                    |     | 18    |
| 17/2022         |          |                    |     |          |                    |     |          |                    |      | 3.8      | 0.2                | 18.9  |              |                    |       | 92.3         | 75.9               | 98.6 | 3.8               | 0.2                | 18.9 |                   |                    |       |          |                    |     | 26    |
| 18/2022         |          |                    |     |          |                    |     |          |                    |      | 6.3      | 1.1                | 20.1  |              |                    |       | 93.8         | 79.9               | 98.9 |                   |                    |      |                   |                    |       |          |                    |     | 32    |
| 19/2022         |          |                    |     |          |                    |     |          |                    |      | 7.9      | 3.4                | 17.3  |              |                    |       | 87.3         | 76.9               | 93.4 | 4.8               | 1.3                | 13.1 |                   |                    |       |          |                    |     | 63    |
| 20/2022         |          |                    |     |          |                    |     |          |                    |      | 6.1      | 2.4                | 14.6  |              |                    |       | 83.3         | 72.6               | 90.4 | 9.1               | 4.2                | 18.4 | 1.5               | 0.1                | 8.1   |          |                    |     | 66    |
| 21/2022         |          |                    |     |          |                    |     |          |                    |      | 7.4      | 3.2                | 16.1  |              |                    |       | 79.4         | 68.4               | 87.3 | 11.8              | 6.1                | 21.5 | 1.5               | 0.1                | 7.9   |          |                    |     | 68    |
| 22/2022         |          |                    |     |          |                    |     |          |                    |      | 1.4      | 0.1                | 7.7   |              |                    |       | 84.3         | 74.0               | 91.0 | 12.9              | 6.9                | 22.7 | 1.4               | 0.1                | 7.7   |          |                    |     | 70    |
| 23/2022         |          |                    |     |          |                    |     |          |                    |      | 3.7      | 1.0                | 10.3  |              |                    |       | 61.7         | 50.8               | 71.6 | 18.5              | 11.6               | 28.3 | 16.0              | 9.6                | 25.5  |          |                    |     | 81    |
| 24/2022         |          |                    |     |          |                    |     |          |                    |      | 5.8      | 1.6                | 15.6  |              |                    |       | 61.5         | 48.0               | 73.5 | 25.0              | 15.2               | 38.2 | 7.7               | 3.0                | 18.2  |          |                    |     | 52    |
| 25/2022         |          |                    |     |          |                    |     |          |                    |      | 2.0      | 0.1                | 10.7  |              |                    |       | 38.8         | 26.4               | 52.8 | 26.5              | 16.2               | 40.3 | 32.7              | 21.2               | 46.6  |          |                    |     | 49    |
| 26/2022         |          |                    |     |          |                    |     |          |                    |      | 4.2      | 0.2                | 20.2  |              |                    |       | 25.0         | 12.0               | 44.9 | 12.5              | 4.3                | 31.0 | 58.3              | 38.8               | 75.5  |          |                    |     | 24    |
| 27/2022         |          |                    |     |          |                    |     |          |                    |      |          |                    |       |              |                    |       | 25.0         | 13.3               | 42.1 | 9.4               | 3.2                | 24.2 | 65.6              | 48.3               | 79.6  |          |                    |     | 32    |
| 28/2022         |          |                    |     |          |                    |     |          |                    |      |          |                    |       |              |                    |       | 9.1          | 3.1                | 23.6 | 6.1               | 1.1                | 19.6 | 84.8              | 69.1               | 93.3  |          |                    |     | 33    |
| 29/2022         |          |                    |     |          |                    |     |          |                    |      |          |                    |       |              |                    |       | 2.1          | 0.1                | 11.1 | 6.4               | 2.2                | 17.2 | 91.5              | 80.1               | 96.6  |          |                    |     | 47    |
| 30/2022         |          |                    |     |          |                    |     |          |                    |      |          |                    |       |              |                    |       |              |                    |      |                   |                    |      | 100.0             | 83.9               | 100.0 |          |                    |     | 20    |
| 31/2022         |          |                    |     |          |                    |     |          |                    |      |          |                    |       |              |                    |       |              |                    |      |                   |                    |      | 100.0             | 70.1               | 100.0 |          |                    |     | 9     |
| Total           | 4        |                    |     | 9        |                    |     | 32       |                    |      | 933      |                    |       | 1718         |                    |       | 480          |                    |      | 80                |                    |      | 172               |                    |       | 3        |                    |     | 3431  |

<sup>1</sup> Only cases from individuals without history of travel or close contact with travelers are included.<sup>2</sup> The confidence interval of the frequency was estimated with the Wilson/Brown method, implemented in the Graph Pad Prism v.8.3 program (California, United States, www.graphpad.com).
